# Supplementary material
Source: HighWire-hosted journal article supplement (https://bmjopen.bmj.com/content/12/8/e059834)
Supplement: inline-supplementary-material-1 [file inline-supplementary-material-1.pdf]

*Appendix I: Search strategy***Search strategy for PubMed**

| <b>No.</b> | <b>Search terms</b>                                                                             |
|------------|-------------------------------------------------------------------------------------------------|
| 1.         | Diabetes Mellitus, Adult-Onset <input type="checkbox"/> Diabetes Mellitus, Noninsulin-Dependent |
| 2.         | Diabetes Mellitus, Ketosis-Resistant                                                            |
| 3.         | Diabetes Mellitus, Maturity-Onset                                                               |
| 4.         | Diabetes Mellitus, Non-Insulin Dependent                                                        |
| 5.         | Non-Insulin-Dependent Diabetes Mellitus                                                         |
| 6.         | Diabetes Mellitus, Slow-Onset                                                                   |
| 7.         | Diabetes Mellitus, Stable                                                                       |
| 8.         | NIDDM                                                                                           |
| 9.         | Diabetes Mellitus, Type II                                                                      |
| 10.        | Thiamin                                                                                         |
| 11.        | Vitamin B1                                                                                      |
| 12.        | Aneurin                                                                                         |
| 13.        | Vitamin B 1                                                                                     |
| 14.        | Thiamine Mononitrate                                                                            |
| 15.        | S-benzoylthiamine monophosphate                                                                 |
| 16.        | Benfotiamine                                                                                    |
| 17.        | Benphothiamine                                                                                  |
| 18.        | Blood sugar                                                                                     |
| 19.        | Fasting blood glucose                                                                           |
| 20.        | Post prandial blood glucose                                                                     |
| 21.        | Glycosylated haemoglobin                                                                        |
| 22.        | HbA1C                                                                                           |
| 23.        | 1 OR 2 OR 3 OR 4 OR 5 OR 6 OR 7 OR 8 OR 9                                                       |
| 24.        | 10 OR 11 OR 12 OR 13 OR 14 OR 15 OR 16 OR 17                                                    |
| 25.        | 18 OR 19 OR 20 OR 21 OR 22                                                                      |

|     |                                                                                                                                                                                                                                                           |
|-----|-----------------------------------------------------------------------------------------------------------------------------------------------------------------------------------------------------------------------------------------------------------|
| 26. | 23 AND 24 AND 25                                                                                                                                                                                                                                          |
| 27. | limit 26 to (english language and humans and (adaptive clinical trial or clinical study or clinical trial, all or clinical trial, phase i or clinical trial, phase ii or clinical trial, phase iii or clinical trial, phase iv or clinical trial or RCT)) |
| 28. | limit 27 to adults more than 19 years                                                                                                                                                                                                                     |

**Search strategy for Cochrane Library**

| <b>No.</b> | <b>Search terms</b>                                           |
|------------|---------------------------------------------------------------|
| 1.         | Mesh descriptor [Diabetes Mellitus, type 2] explode all trees |
| 2.         | Mesh descriptor [vitamin B1] explode all trees                |
| 3.         | Mesh descriptor [thiamine] explode all trees                  |
| 4.         | Mesh descriptor [Benfotiamine] explode all trees              |
| 5.         | Mesh descriptor [Glycated haemoglobin] explode all trees      |
| 6.         | Mesh descriptor [Blood glucose] explode all trees             |
| 7.         | #2 OR #3 OR #4                                                |
| 8.         | #5 OR #6                                                      |
| 9.         | #1 and #7 and #8                                              |

**Search strategy for Tripdatabase**

| <b>No.</b> | <b>Search terms</b>                     |
|------------|-----------------------------------------|
| 1.         | NIDDM                                   |
| 2.         | Type II Diabetes mellitus               |
| 3.         | Non Insulin Dependent Diabetes Mellitus |
| 4.         | Diabetes Mellitus, Type II              |
| 5.         | Adults                                  |
| 6.         | Vitamin B1                              |
| 7.         | Thiamine                                |
| 8.         | Benfotiamine                            |
| 9.         | Benphothiamine                          |
| 10.        | Fasting blood glucose                   |
| 11.        | FBG                                     |
| 12.        | Post prandial blood glucose             |
| 13.        | PPG                                     |
| 14.        | HbA1C                                   |
| 15.        | Glycosylated hemoglobin                 |
| 16.        | Glycatedhemoglobin                      |
| 17.        | 1 OR 2 OR 3 OR 4                        |
| 18.        | 6 OR 7 OR 8 OR 9                        |
| 19.        | 10 OR 11 OR 12 OR 13 OR 14 OR 15 OR 16  |
| 20.        | 5 AND 17 AND 18 AND 19                  |
