# Supplementary material
Source: HighWire-hosted journal article supplement (https://bmjopen.bmj.com/content/12/8/e059834)
Supplement: inline-supplementary-material-2 [file inline-supplementary-material-2.pdf]

*Appendix II: List of excluded studies****Excluded articles***

Thornalley PJ, Jahan I, Ng R. Suppression of the accumulation of triosephosphates and increased formation of methylglyoxal in human red blood cells during hyperglycaemia by thiamine in vitro. *The Journal of Biochemistry*. 2001;129(4):543-9.

**Reason for exclusion: In vitro study.**

Alkhalaf A, Kleefstra N, Groenier KH, Bilo HJ, Gans RO, Heeringa P, et al. Effect of benfotiamine on advanced glycationendproducts and markers of endothelial dysfunction and inflammation in diabetic nephropathy. *PLoS One*. 2012;7(7).

**Reason for exclusion: Outcome of interest not assessed.**

Haupt E, Ledermann H, Köpcke W. Benfotiamine in the treatment of diabetic. *International journal of clinical pharmacology and therapeutics*. 2005;43(2):71-7.

**Reason for exclusion: Outcome of interest not assessed.**

Babaei-Jadidi R, Karachalias N, Ahmed N, Battah S, Thornalley PJ. Prevention of incipient diabetic nephropathy by high-dose thiamine and benfotiamine. *Diabetes*. 2003;52(8):2110-20.

**Reason for exclusion: Participants rats.**

Suzuki M, Itokawa Y. Effects of thiamine supplementation on exercise-induced fatigue. *Metabolic brain disease*. 1996;11(1):95-106.

**Reason for exclusion: Outcome of interest not assessed.**

Fraser DA, Diep LM, Hovden IA, Nilsen KB, Svein KA, Seljeflot I, et al. The effects of long-term oral benfotiamine supplementation on peripheral nerve function and inflammatory markers in patients with type 1 diabetes: a 24-month, double-blind, randomized, placebo-controlled trial. *Diabetes Care*. 2012;35(5):1095-7.

**Reason for exclusion: Included only type 1 diabetics.**

Schwab S, Zierer A, Heier M, Fischer B, Huth C, Baumert J, et al. Intake of vitamin and mineral supplements and longitudinal association with HbA1c levels in the general non-diabetic population—results from the MONICA/KORA S3/F3 study. *PLoS one*. 2015;10(10).

**Reason for exclusion: Participants nondiabetic.**
